# Supplementary material for: The First Glimpse of Streptocarpus ionanthus (Gesneriaceae) Phylogenomics: Analysis of Five Subspecies’ Chloroplast Genomes
Source: PubMed Central journal article supplement (PMC7238178; doi:10.3390/plants9040456), 2020-04-04
Supplement: plants-09-00456-s001.pdf [file plants-09-00456-s001.pdf]

**Table S1.** Species used in the phylogenetic analysis.

| Species                                          | Accession Number |
|--------------------------------------------------|------------------|
| <i>Str. ionanthus</i> subsp. <i>grotei</i>       | MN935469         |
| <i>Str. ionanthus</i> subsp. <i>grandifolius</i> | MN935471         |
| <i>Str. ionanthus</i> subsp. <i>orbicularis</i>  | MN935470         |
| <i>Str. ionanthus</i> subsp. <i>rupicola</i>     | MN935473         |
| <i>Str. ionanthus</i> subsp. <i>velutinus</i>    | MN935472         |
| <i>Str. teitensis</i>                            | MF596485         |
| <i>Haberlea rhodopensis</i>                      | NC_031852        |
| <i>Lysionotus pauciflorus</i>                    | NC_034660        |
| <i>Petrocodon jingxiensis</i>                    | NC_044477        |
| <i>Primulina eburnea</i>                         | NC_036100        |
| <i>Primulina huaijiensis</i>                     | NC_036413        |
| <i>Primulina liboensis</i>                       | NC_036101        |
| <i>Primulina linearifolia</i>                    | NC_036414        |
| <i>Dorcoceras hygrometricum</i>                  | NC_016468        |
| <i>Scrophularia henryi</i>                       | NC_036943        |
| <i>Sesamum indicum</i>                           | JN637766         |
